# Supplementary material
Source: PubMed Central journal article supplement (PMC3918452)

# Supplementary Figure 1

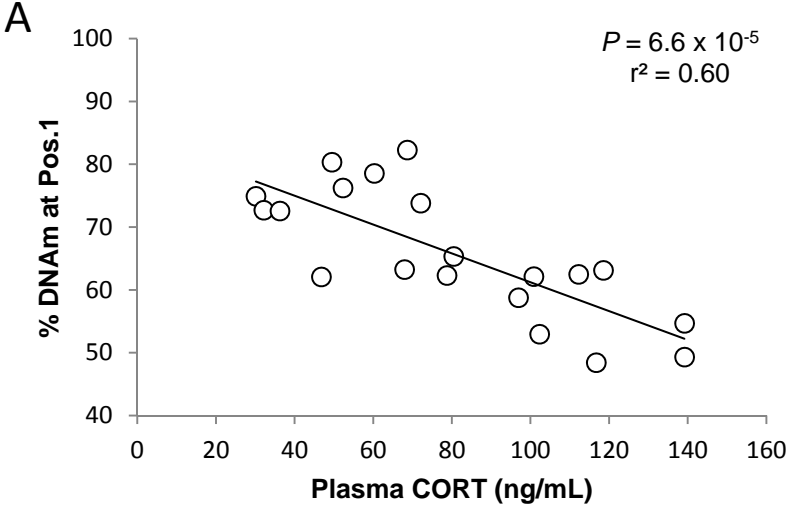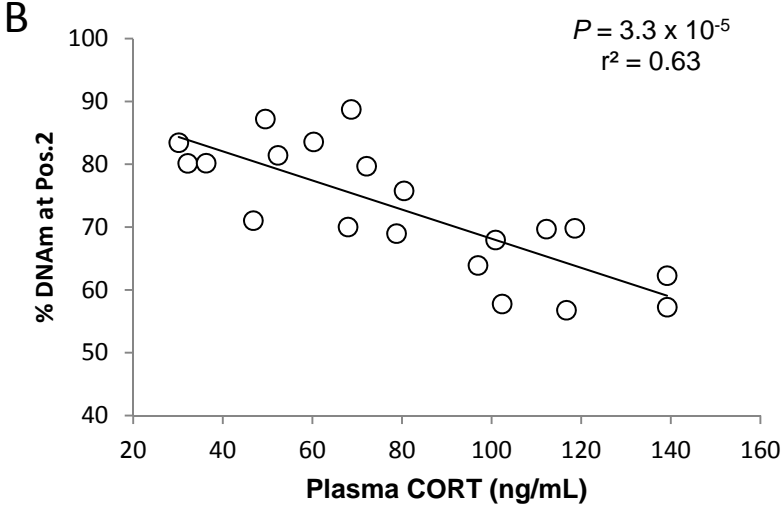

Supplement: NIHMS548910-supplement-Suppl_Fig_1.pdf [file NIHMS548910-supplement-Suppl_Fig_1.pdf]

# Supplementary Figure 2

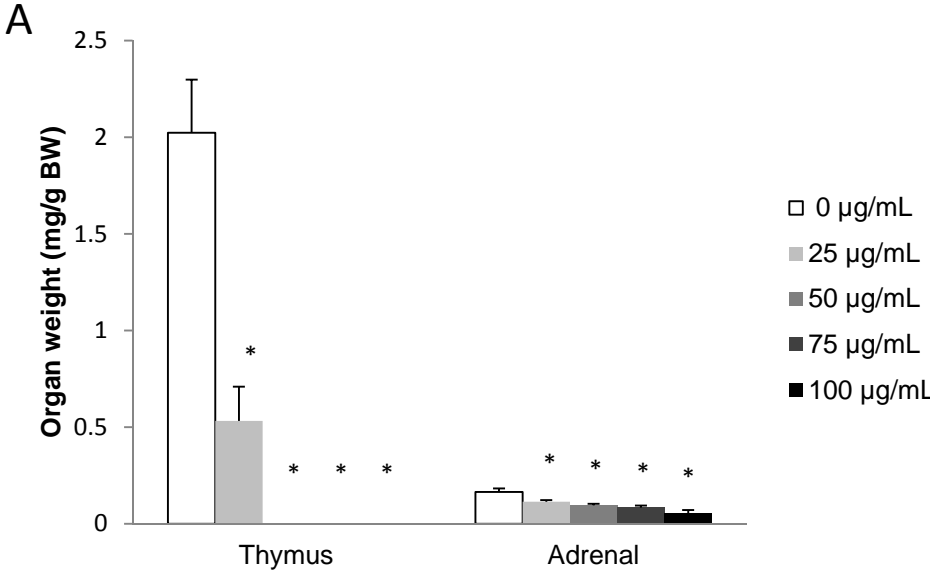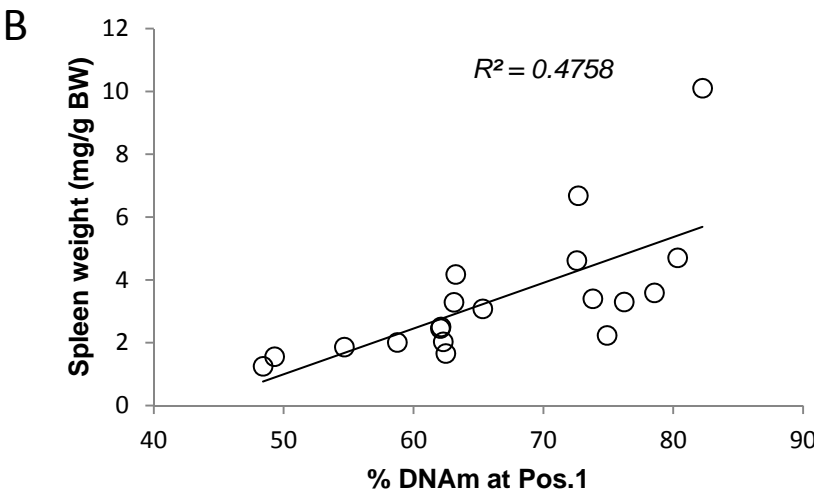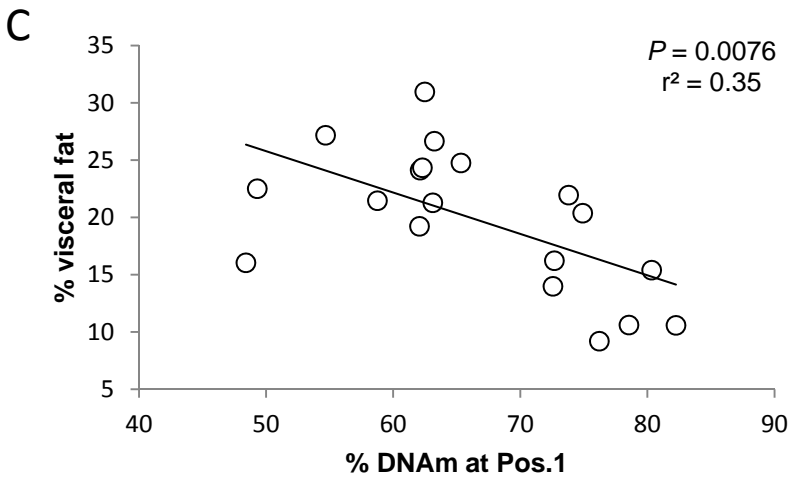

D

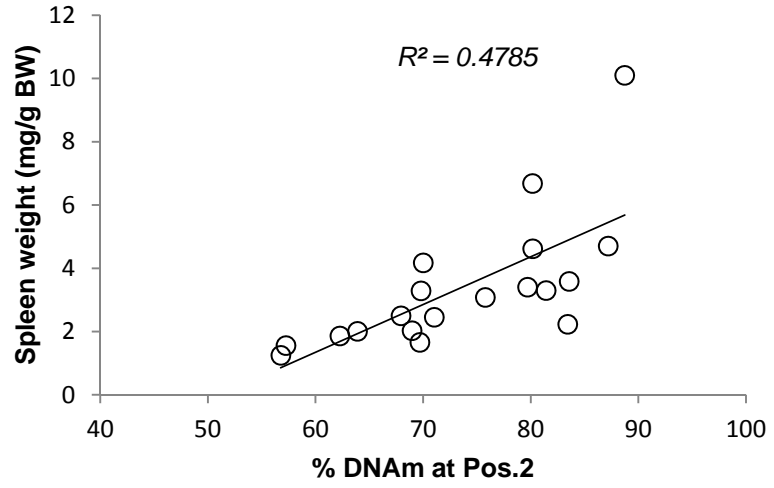

E

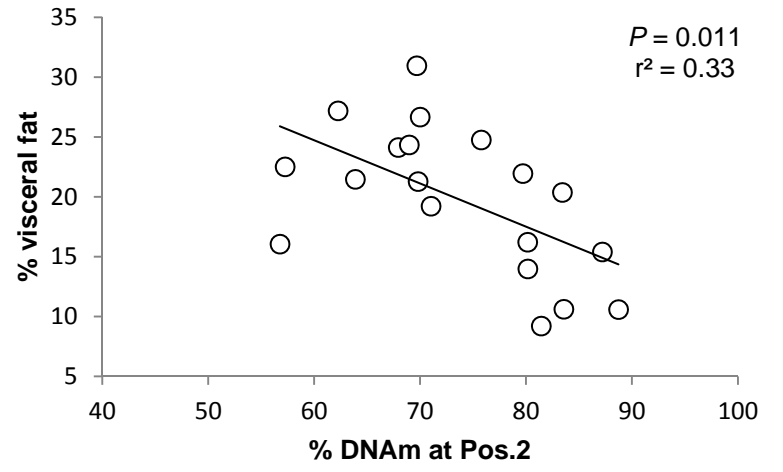

Supplement: NIHMS548910-supplement-Suppl_Fig_2.pdf [file NIHMS548910-supplement-Suppl_Fig_2.pdf]
